# Supplementary material for: Synergetic Effect of Brønsted/Lewis Acid Sites and Water on the Catalytic Dehydration of Glucose to 5‐Hydroxymethylfurfural by Heteropolyacid‐Based Ionic Hybrids
Source: PubMed Central journal article supplement — ChemistryOpen. 2018 Oct 12;7(10):824–32. doi: 10.1002/open.201800138 (PMC6182251; doi:10.1002/open.201800138), 2018-10-12
Supplement: OPEN-7-824-s001.pdf [file OPEN-7-824-s001.pdf]

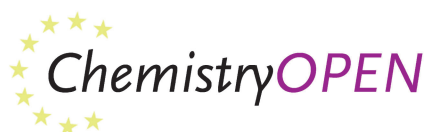

## Supporting Information

© 2018 The Authors. Published by Wiley-VCH Verlag GmbH & Co. KGaA, Weinheim

### **Synergetic Effect of Brønsted/Lewis Acid Sites and Water on the Catalytic Dehydration of Glucose to 5-Hydroxymethylfurfural by Heteropolyacid-Based Ionic Hybrids**

Pingping Zhao,<sup>\*,[a, b]</sup> Hongyou Cui,<sup>\*,[b]</sup> Yunyun Zhang,<sup>[b]</sup> Yuan Zhang,<sup>[b]</sup> Yong Wang,<sup>[b]</sup> Yali Zhang,<sup>[b]</sup> Yujiao Xie,<sup>[b]</sup> and Weiming Yi<sup>[c]</sup>

open\_201800138\_sm\_miscellaneous\_information.pdf

# Supporting Information

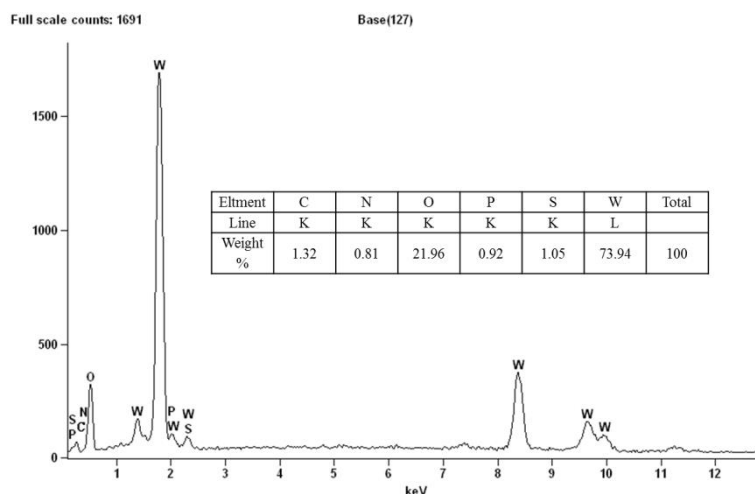

**Figure S1** SEM-EDX analysis of [PzS]H<sub>2</sub>PW.

## Theoretical calculation of Brønsted and Lewis acid sites on [PzS]<sub>x</sub>H<sub>y</sub>PW catalysts.

First the acid strength of [PzS]H<sub>2</sub>PW cannot be measured by NH<sub>3</sub>-TPD technique due to the high temperature instability of the organic moiety. Furthermore, we have tried to determine the number of acidic sites by pyridine adsorption infrared spectroscopy. However, the viscosity of [PzS]H<sub>2</sub>PW is too high to be detected by the method of tableting. Therefore, we only gave the theoretical number of acid sites according to the chemical formula.

For each mol of [PzS]<sub>x</sub>H<sub>y</sub>PW formula, we assumed a possible maximum of 3 mol Brønsted acid sites and 1 mol Lewis acid sites for H<sub>3</sub>PW<sub>12</sub>O<sub>40</sub> (3 H protons and 1 PW anion);

2 mol Lewis acid sites for Pz (2 N that can accept H protons);

1 mol Brønsted acid sites and 1 mol Lewis acid sites for [PzS]Cl (1 SO<sub>3</sub>H and 1 N),

2 mol Brønsted acid sites for [PzS-H]Cl<sub>2</sub> (1 SO<sub>3</sub>H and 1 NH);

3 mol Brønsted acid sites and 2 mol Lewis acid sites for [PzS]H<sub>2</sub>PW (1 SO<sub>3</sub>H, 2 H<sub>2</sub>PW and 1 N, 1 PW anion);

3 mol Brønsted acid sites and 1 mol Lewis acid sites for [PzS-H]HPW (1 SO<sub>3</sub>H, 1 NH, 1 HPW and 1 PW anion)

3 mol Brønsted acid sites and 3 mol Lewis acid sites for [PzS]<sub>2</sub>HPW (2 SO<sub>3</sub>H, 1 HPW and 2 N, 1 PW anion)

3 mol Brønsted acid sites and 4 mol Lewis acid sites for [PzS]<sub>3</sub>PW (3 SO<sub>3</sub>H, and 3 N, 1 PW anion)

### The basic characterization data for synthesized compounds

- (1) [PzS]Cl: Elemental analysis Calcd: C, 24.41 wt%; N, 14.24 wt%; H, 2.54 wt%. Found: C, 24.58 wt%; N, 13.97 wt%; H, 2.56 wt%. <sup>1</sup>H NMR (300 MHz, D<sup>6</sup>-DMSO, TMS) δ 9.75 (d, 2H), 9.57 (m, 2H), 8.50 (s, 1H).
- (2) [PzS-H]Cl<sub>2</sub>: Elemental analysis Calcd: C, 12.87 wt%; N, 3.75 wt%; H, 2.02 wt%. Found: C, 12.73 wt%; N, 3.71 wt%; H, 1.98 wt%. <sup>1</sup>H NMR (300 MHz, D<sup>6</sup>-DMSO, TMS) δ 13.38 (s, 1H), 9.46 (d, 2H), 9.12 (m, 2H), 8.40 (s, 1H).
- (3) [PzS]H<sub>2</sub>PW: Elemental analysis Calcd: C, 1.58 wt%; N, 0.92 wt%; H, 0.23 wt%. Found: C, 1.61 wt%; N, 0.98 wt%; H, 0.23 wt%. <sup>1</sup>H NMR(300 MHz, D<sup>6</sup>-DMSO, TMS) δ 9.56 (d, 2H), 9.69 (m, 2H), 8.62 (s, 1H).
- (4) [PzS-H]HPW: Elemental analysis Calcd: C, 12.87 wt%; N, 3.75 wt%; H, 2.02 wt%. Found: C, 12.73 wt%; N, 3.71 wt%; H, 1.98 wt%. <sup>1</sup>H NMR(300 MHz, D<sup>6</sup>-DMSO, TMS) δ 13.32 (s, 1H), 9.39 (d, 2H), 9.21 (m, 2H), 8.85 (s, 1H).
- (5) [PzS]<sub>2</sub>HPW: Elemental analysis Calcd: C, 2.99 wt%; N, 1.75 wt%; H, 0.37 wt%. Found: C, 2.54 wt%; N, 1.68 wt%; H, 0.25 wt%.
- (6) [PzS]<sub>3</sub>PW: Elemental analysis Calcd: C, 4.28 wt%; N, 2.50 wt%; H, 0.45 wt%. Found: C, 3.73 wt%; N, 2.25 wt%; H, 0.34 wt%.
- (7) [MimPS]H<sub>2</sub>PW: Elemental analysis Calcd: C, 2.72 wt%; N, 0.91 wt%; H, 0.49 wt%. Found: C, 2.87 wt%; N, 0.96 wt%; H, 0.62 wt%. <sup>1</sup>H NMR (300 MHz, D<sup>6</sup>-DMSO, TMS) δ 2.24 (m, 2H), 2.83 (t, 2H), 3.81 (s, 3H), 4.28 (t, 2H), 4.65 (s, 1H), 7.37 (d, 1H), 7.44 (d, 1H), 8.67 (s, 2H).

### Recycling test

To examine the durability of [PzS]<sub>2</sub>HPW, the recycling tests of water phase in reaction mixture for glucose dehydration to HMF were performed, as shown in Figure S2. It can be seen that the decline in the HMF yield is unnoticeable, suggesting that [PzS]<sub>2</sub>HPW is a reusable catalyst in water-NaCl/THF for glucose dehydration to

HMF.

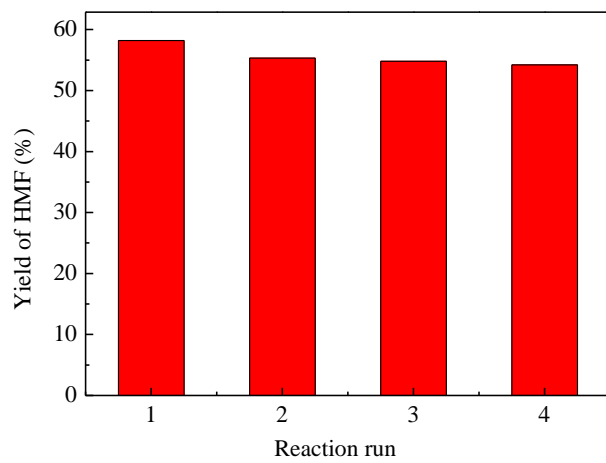

**Figure S2** Catalytic recycling of [PzS]<sub>2</sub>HPW for glucose dehydration to HMF.
